# Supplementary material for: Impact of work schedules of senior resident physicians on patient and resident physician safety: nationwide, prospective cohort study
Source: PubMed Central journal article supplement — BMJ Med. 2023 Mar 30;2(1):e000320. doi: 10.1136/bmjmed-2022-000320 (PMC10254593; doi:10.1136/bmjmed-2022-000320), 2023-03-30
Supplement: bmjmed-2022-000320supp001.pdf [file bmjmed-2022-000320supp001.pdf]

## Supplemental Material

**SUPPLEMENTAL APPENDIX****Table of Contents**

- Page 2:** The adjusted association between increasing weekly work hours and adverse health and safety outcomes among PGY2+ resident physicians stratified by cohort.
- Page 3:** The incidence of adverse outcomes by exposure definition.
- Page 4-5:** Sensitivity analyses exploring differing treatments of missing values.
- Page 6-11:** Relevant items from the monthly questionnaire used to collect data from participants in both cohorts.

## Supplemental Material

**Analyses by cohort.** The results in both cohorts are similar to the combined cohort presented in the main paper. The 2002-2007 data set contributes relatively less data to the overall analysis (~10,000 fewer monthly surveys) and lacks statistical power to estimate the association for less frequent outcomes. The observed associations are similar in each cohort, but for subsets of outcomes (e.g., adverse events from the larger category of medical errors) the model does not converge when using only data from cohort 1.

**Table S1a.** The adjusted association between increasing weekly work hours and adverse health and safety outcomes among PGY2+ resident physicians from 2002-2007.

|                        | Weekly Work Hours |                  |                  |                  |                  | p-value |
|------------------------|-------------------|------------------|------------------|------------------|------------------|---------|
|                        | ≤48               | >48 & ≤60        | >60 & ≤70        | >70 & ≤80        | >80              |         |
| <b>Patient Safety</b>  |                   |                  |                  |                  |                  |         |
| Medical Errors         | Ref               | 1.55 (1.22-1.97) | 2.18 (1.71-2.77) | 3.23 (2.49-4.18) | 4.23 (3.20-5.57) | <0.001  |
| PAE                    | Ref               | ---              | ---              | ---              | ---              | ---     |
| Fatal PAE              | Ref               | ---              | ---              | ---              | ---              | ---     |
| <b>Resident Safety</b> |                   |                  |                  |                  |                  |         |
| Crashes                | Ref               | ---              | ---              | ---              | ---              | ---     |
| Crashes leaving work   | Ref               | ---              | ---              | ---              | ---              | ---     |
| Near-crashes           | Ref               | 1.23 (1.00-1.50) | 1.38 (1.11-1.71) | 1.74 (1.40-2.17) | 2.65 (2.14-3.28) | <0.001  |
| Occupational Exposures | Ref               | 1.78 (1.36-2.32) | 2.50 (1.92-3.25) | 3.56 (2.74-4.63) | 4.48 (3.41-5.90) | <0.001  |
| Percutaneous Injuries  | Ref               | ---              | ---              | ---              | ---              | ---     |
| Attentional Failures   | Ref               | 1.41 (1.28-1.55) | 2.09 (1.87-2.33) | 2.72 (2.44-3.03) | 3.71 (3.32-4.16) | <0.001  |

All models are adjusted for age, gender, specialty, and cohort. Occupational exposures, percutaneous injuries, and patient safety outcomes are further adjusted for hours in patient care. P-values are obtained from likelihood ratio tests testing a linear trend through the categories.

**Table S1b.** The adjusted association between increasing weekly work hours and adverse health and safety outcomes among PGY2+ resident physicians from 2015-2017.

|                        | Weekly Work Hours |                  |                   |                   |                    | p-value |
|------------------------|-------------------|------------------|-------------------|-------------------|--------------------|---------|
|                        | ≤48               | >48 & ≤60        | >60 & ≤70         | >70 & ≤80         | >80                |         |
| <b>Patient Safety</b>  |                   |                  |                   |                   |                    |         |
| Medical Errors         | Ref               | 1.67 (1.38-2.03) | 2.52 (2.03-3.13)  | 3.18 (2.54-3.98)  | 3.79 (2.91-4.93)   | <0.001  |
| PAE                    | Ref               | 1.63 (0.97-2.75) | 3.91 (2.36-6.50)  | 3.31 (1.91-5.73)  | 4.84 (2.58-9.08)   | <0.001  |
| Fatal PAE              | Ref               | 0.74 (0.10-5.27) | 6.93 (1.48-32.51) | 5.28 (0.99-28.17) | 16.05 (2.99-86.03) | <0.001  |
| <b>Resident Safety</b> |                   |                  |                   |                   |                    |         |
| Crashes                | Ref               | 0.96 (0.70-1.30) | 1.01 (0.71-1.42)  | 0.94 (0.66-1.36)  | 1.30 (0.85-1.99)   | 0.75    |
| Crashes leaving work   | Ref               | 0.98 (0.57-1.71) | 1.10 (0.60-2.01)  | 1.17 (0.63-2.16)  | 2.41 (1.29-4.53)   | 0.25    |
| Near-crashes           | Ref               | 1.61 (1.33-1.94) | 2.17 (1.76-2.68)  | 2.54 (2.05-3.15)  | 3.31 (2.57-4.27)   | <0.001  |
| Occupational Exposures | Ref               | 1.78 (1.35-2.33) | 2.41 (1.83-3.17)  | 3.10 (2.34-4.11)  | 3.81 (2.73-5.30)   | <0.001  |
| Percutaneous Injuries  | Ref               | 1.70 (1.16-2.51) | 1.97 (1.32-2.94)  | 2.82 (1.87-4.23)  | 5.29 (3.47-8.07)   | <0.001  |
| Attentional Failures   | Ref               | 1.29 (1.22-1.37) | 1.67 (1.55-1.80)  | 2.08 (1.90-2.29)  | 2.71 (2.45-2.98)   | <0.001  |

All models are adjusted for age, gender, specialty, and cohort. Occupational exposures, percutaneous injuries, and patient safety outcomes are further adjusted for hours in patient care. P-values are obtained from likelihood ratio tests testing a linear trend through the categories.

## Supplemental Material

**Table S2.** The incidence of outcomes by weekly work hour categories

|                            | Weekly Work Hours |           |           |           |        |
|----------------------------|-------------------|-----------|-----------|-----------|--------|
|                            | ≤48               | >48 & ≤60 | >60 & ≤70 | >70 & ≤80 | >80    |
| <b>Patient Safety</b>      |                   |           |           |           |        |
| Medical Error rate         | 3.02              | 5.02      | 7.87      | 10.80     | 14.33  |
| PAE rate                   | 0.47              | 0.78      | 1.69      | 1.82      | 2.78   |
| Fatal PAE rate             | 0.10              | 0.07      | 0.36      | 0.33      | 0.68   |
| <b>Resident Safety</b>     |                   |           |           |           |        |
| Crash rate                 | 1.52              | 1.41      | 1.51      | 1.48      | 1.99   |
| Crashes leaving work rate  | 0.55              | 0.52      | 0.53      | 0.52      | 1.06   |
| Near-crash rate            | 5.71              | 7.81      | 9.91      | 12.03     | 17.87  |
| Occupational Exposure rate | 1.57              | 2.71      | 3.86      | 5.42      | 7.40   |
| Percutaneous Injury rate   | 0.68              | 1.13      | 1.74      | 2.42      | 4.24   |
| Attentional Failure rate   | 84.45             | 119.00    | 157.46    | 212.64    | 301.66 |

*All estimates expressed in rate per 100 person-months.*

**Table S3:** The incidence of outcomes by exposures of interest.

|                        | Weekly Work Hours (WWH) |        | Extended-duration Shifts (EDS) |        |        | Combined categorical WWH and EDS |                |                |                |
|------------------------|-------------------------|--------|--------------------------------|--------|--------|----------------------------------|----------------|----------------|----------------|
|                        | ≤80                     | >80    | None                           | 1-4    | ≥5     | ≤80 WWH No EDS                   | ≤80 WWH ≥1 EDS | >80 WWH No EDS | >80 WWH ≥1 EDS |
| <b>Patient Safety</b>  |                         |        |                                |        |        |                                  |                |                |                |
| Medical Errors         | 6.23                    | 14.33  | 4.90                           | 8.28   | 14.50  | 4.54                             | 9.63           | 12.12          | 14.93          |
| PAE                    | 1.10                    | 2.78   | 0.92                           | 1.42   | 2.48   | 0.84                             | 1.61           | 3.03           | 2.71           |
| Fatal PAE              | 0.19                    | 0.68   | 0.14                           | 0.29   | 0.55   | 0.12                             | 0.32           | 0.66           | 0.68           |
| Crashes                | 1.47                    | 1.99   | 1.38                           | 1.70   | 1.85   | 1.39                             | 1.65           | 1.28           | 2.19           |
| Crashes leaving work   | 0.53                    | 1.06   | 0.47                           | 0.71   | 0.89   | 0.46                             | 0.67           | 0.51           | 1.22           |
| Near-crashes           | 8.52                    | 17.87  | 7.49                           | 10.36  | 16.33  | 7.35                             | 10.92          | 11.55          | 19.67          |
| Occupational Exposures | 3.19                    | 7.40   | 2.81                           | 4.25   | 5.88   | 2.71                             | 4.13           | 5.68           | 7.86           |
| Percutaneous Injuries  | 1.39                    | 4.24   | 1.25                           | 1.97   | 2.96   | 1.20                             | 1.78           | 2.78           | 4.64           |
| Attentional Failures   | 136.33                  | 301.66 | 123.36                         | 168.55 | 251.26 | 118.37                           | 172.68         | 266.10         | 311.62         |

*All estimates expressed in rate per 100 person-months.*

## Supplemental Material

**Table S4a:** The adjusted association between increasing weekly work hours and adverse health and safety outcomes *with missing age imputed using the median value for each cohort.*

|                        | Weekly Work Hours |                  |                  |                  |                  | p-value |
|------------------------|-------------------|------------------|------------------|------------------|------------------|---------|
|                        | ≤48               | >48 & ≤60        | >60 & ≤70        | >70 & ≤80        | >80              |         |
| <b>Patient Safety</b>  |                   |                  |                  |                  |                  |         |
| Medical Errors         | Ref               | 1.61 (1.39-1.87) | 2.36 (2.01-2.78) | 3.19 (2.69-3.78) | 4.01 (3.32-4.84) | <0.001  |
| PAE                    | Ref               | 1.54 (1.06-2.24) | 2.93 (2.04-4.23) | 2.84 (1.93-4.19) | 3.84 (2.51-5.87) | <0.001  |
| Fatal PAE              | Ref               | 0.66 (0.25-1.70) | 2.75 (1.23-6.12) | 2.51 (0.87-5.30) | 3.67 (1.45-9.30) | <0.001  |
| <b>Resident Safety</b> |                   |                  |                  |                  |                  |         |
| Crashes                | Ref               | 0.93 (0.74-1.19) | 0.99 (0.76-1.28) | 0.94 (0.72-1.24) | 1.24 (0.92-1.66) | 0.49    |
| Crashes leaving work   | Ref               | 0.96 (0.66-1.41) | 0.96 (0.62-1.47) | 0.92 (0.59-1.43) | 1.78 (1.15-2.76) | 0.13    |
| Near-crashes           | Ref               | 1.41 (1.23-1.61) | 1.77 (1.52-2.06) | 2.11 (1.81-2.46) | 2.97 (2.52-3.50) | <0.001  |
| Occupational Exposures | Ref               | 1.78 (1.48-2.16) | 2.46 (2.03-2.98) | 3.35 (2.77-4.06) | 4.19 (3.39-5.17) | <0.001  |
| Percutaneous Injuries  | Ref               | 1.71 (1.28-2.28) | 2.59 (1.95-3.44) | 3.49 (2.62-4.64) | 5.80 (4.32-7.79) | <0.001  |
| Attentional Failures   | Ref               | 1.33 (1.27-1.40) | 1.80 (1.69-1.92) | 2.29 (2.13-2.46) | 3.06 (2.85-3.30) | <0.001  |

All models are adjusted for age, gender, specialty, and cohort. Occupational exposures, percutaneous injuries, and patient safety outcomes are further adjusted for hours in patient care. P-values are obtained from likelihood ratio tests testing a linear trend through the categories.

**Table S4b:** The adjusted association between increasing weekly work hours and adverse health and safety outcomes *among those with complete information (no missing values).*

|                        | Weekly Work Hours |                  |                  |                  |                  | p-value |
|------------------------|-------------------|------------------|------------------|------------------|------------------|---------|
|                        | ≤48               | >48 & ≤60        | >60 & ≤70        | >70 & ≤80        | >80              |         |
| <b>Patient Safety</b>  |                   |                  |                  |                  |                  |         |
| Medical Errors         | Ref               | 1.59 (1.37-1.85) | 2.37 (2.02-2.79) | 3.23 (2.73-3.83) | 4.15 (3.43-5.02) | <0.001  |
| PAE                    | Ref               | 1.59 (1.08-2.32) | 2.94 (2.03-4.26) | 2.91 (1.96-4.32) | 3.92 (2.55-6.04) | <0.001  |
| Fatal PAE              | Ref               | ---              | ---              | ---              | ---              |         |
| <b>Resident Safety</b> |                   |                  |                  |                  |                  |         |
| Crashes                | Ref               | 0.96 (0.76-1.22) | 0.97 (0.74-1.28) | 0.97 (0.73-1.30) | 1.27 (0.93-1.72) | 0.53    |
| Crashes leaving work   | Ref               | 0.96 (0.65-1.41) | 0.87 (0.55-1.35) | 0.82 (0.50-1.34) | 1.69 (1.07-2.68) | 0.11    |
| Near-crashes           | Ref               | 1.42 (1.24-1.63) | 1.77 (1.51-2.07) | 2.14 (1.82-2.51) | 3.05 (2.57-3.62) | <0.001  |
| Occupational Exposures | Ref               | 1.71 (1.40-2.10) | 2.18 (1.78-2.67) | 2.67 (2.17-3.29) | 3.19 (2.54-4.01) | <0.001  |
| Percutaneous Injuries  | Ref               | 1.64 (1.21-2.23) | 2.29 (1.68-3.11) | 2.62 (1.91-3.59) | 3.75 (2.71-5.18) | <0.001  |
| Attentional Failures   | Ref               | 1.35 (1.28-1.42) | 1.83 (1.72-1.95) | 2.28 (2.13-2.45) | 3.00 (2.79-3.23) | <0.001  |

All models are adjusted for age, gender, specialty, and cohort. Occupational exposures, percutaneous injuries, and patient safety outcomes are further adjusted for hours in patient care. P-values are obtained from likelihood ratio tests testing a linear trend through the categories.

Supplemental Material

**Table S4c:** The adjusted association between increasing weekly work hours and adverse health and safety outcomes *with age omitted from the statistical models.*

|                        | Weekly Work Hours |                  |                  |                  |                   | p-value |
|------------------------|-------------------|------------------|------------------|------------------|-------------------|---------|
|                        | ≤48               | >48 & ≤60        | >60 & ≤70        | >70 & ≤80        | >80               |         |
| <b>Patient Safety</b>  |                   |                  |                  |                  |                   |         |
| Medical Errors         | Ref               | 1.59 (1.38-1.84) | 2.35 (2.01-2.75) | 3.27 (2.76-3.86) | 4.24 (3.52-5.11)  | <0.001  |
| PAE                    | Ref               | 1.55 (1.07-2.25) | 3.02 (2.10-4.34) | 2.98 (2.02-4.38) | 4.04 (2.65-6.17)  | <0.001  |
| Fatal PAE              | Ref               | 0.65 (0.25-1.69) | 3.02 (1.35-6.75) | 2.55 (1.02-6.38) | 4.19 (1.62-10.87) | <0.001  |
| <b>Resident Safety</b> |                   |                  |                  |                  |                   |         |
| Crashes                | Ref               | 0.95 (0.75-1.20) | 1.03 (0.79-1.34) | 1.01 (0.76-1.33) | 1.29 (0.95-1.74)  | 0.45    |
| Crashes leaving work   | Ref               | 0.96 (0.66-1.42) | 0.96 (0.62-1.47) | 0.94 (0.59-1.49) | 1.76 (1.13-2.75)  | 0.15    |
| Near-crashes           | Ref               | 1.40 (1.23-1.60) | 1.79 (1.54-2.09) | 2.17 (1.85-2.54) | 3.09 (2.61-3.66)  | <0.001  |
| Occupational Exposures | Ref               | 1.71 (1.40-2.09) | 2.16 (1.77-2.64) | 2.67 (2.17-3.27) | 3.22 (2.58-4.04)  | <0.001  |
| Percutaneous Injuries  | Ref               | 1.59 (1.18-2.14) | 2.19 (1.62-2.95) | 2.51 (1.84-3.41) | 3.71 (2.70-5.08)  | <0.001  |
| Attentional Failures   | Ref               | 1.34 (1.27-1.41) | 1.82 (1.71-1.94) | 2.30 (2.15-2.47) | 3.04 (2.83-3.26)  | <0.001  |

All models are adjusted for gender, specialty, and cohort. Occupational exposures, percutaneous injuries, and patient safety outcomes are further adjusted for hours in patient care. P-values are obtained from likelihood ratio tests testing a linear trend through the categories.

**Figure S1:** The adjusted association between increasing weekly work hours and adverse health and safety outcomes does not vary by treatment of age.

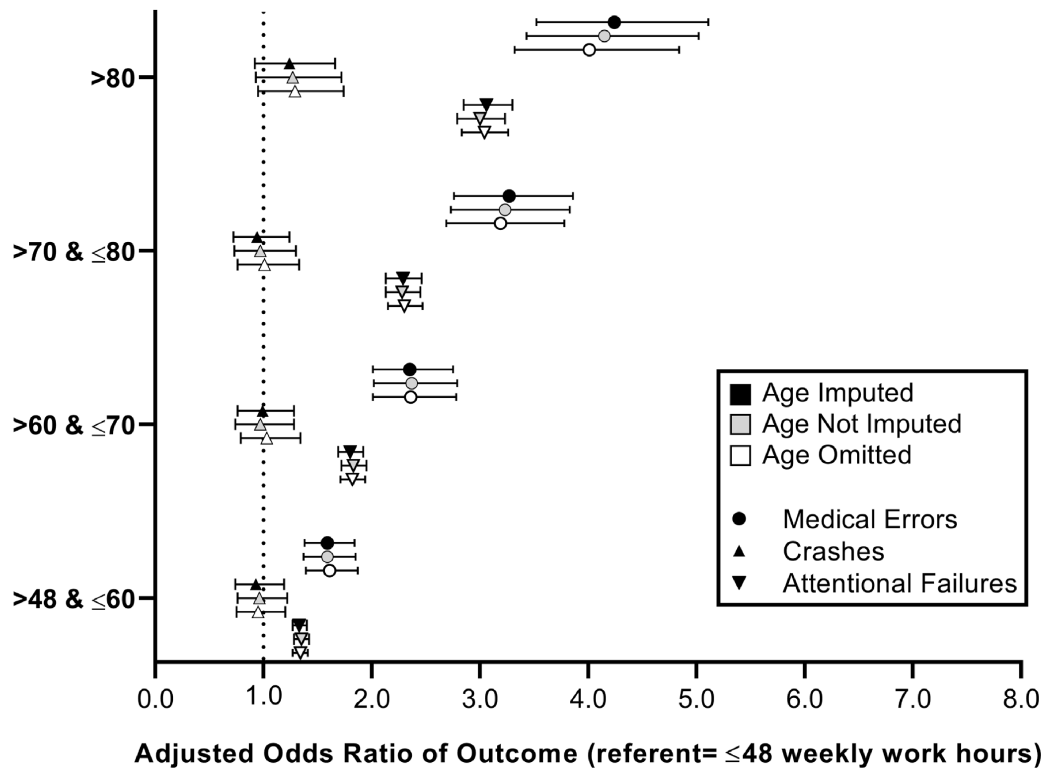

## Supplemental Material

**MONTHLY QUESTIONNAIRE****Work Schedule**

The following questions ask about your schedule in the month of [month] .

*Note that there are 168 hours in one week (7 days x 24 hours). Please round to the nearest hour.*

|                                                                                                                                 | <b>First week of<br/>[month]</b>                                                                                                                                                                                                                                                                                                                                                                                                                           | <b>Second week of<br/>[month]</b>                                                                                                                                                                                                                                                                                                                                                                                                                          | <b>Third week of<br/>[month]</b>                                                                                                                                                                                                                                                                                                                                                                                                                           | <b>Fourth week of<br/>[month]</b>                                                                                                                                                                                                                                                                                                                                                                                                                          |
|---------------------------------------------------------------------------------------------------------------------------------|------------------------------------------------------------------------------------------------------------------------------------------------------------------------------------------------------------------------------------------------------------------------------------------------------------------------------------------------------------------------------------------------------------------------------------------------------------|------------------------------------------------------------------------------------------------------------------------------------------------------------------------------------------------------------------------------------------------------------------------------------------------------------------------------------------------------------------------------------------------------------------------------------------------------------|------------------------------------------------------------------------------------------------------------------------------------------------------------------------------------------------------------------------------------------------------------------------------------------------------------------------------------------------------------------------------------------------------------------------------------------------------------|------------------------------------------------------------------------------------------------------------------------------------------------------------------------------------------------------------------------------------------------------------------------------------------------------------------------------------------------------------------------------------------------------------------------------------------------------------|
| Activity that best describes the week (>4 days)                                                                                 | <input type="radio"/> Outpatient / ambulatory rotation<br><input type="radio"/> In-hospital consult rotation<br><input type="radio"/> Intensive care unit rotation<br><input type="radio"/> In-hospital ward rotation<br><input type="radio"/> Night team / night float<br><input type="radio"/> Emergency Department<br><input type="radio"/> Research<br><input type="radio"/> Elective<br><input type="radio"/> Vacation<br><input type="radio"/> Other | <input type="radio"/> Outpatient / ambulatory rotation<br><input type="radio"/> In-hospital consult rotation<br><input type="radio"/> Intensive care unit rotation<br><input type="radio"/> In-hospital ward rotation<br><input type="radio"/> Night team / night float<br><input type="radio"/> Emergency Department<br><input type="radio"/> Research<br><input type="radio"/> Elective<br><input type="radio"/> Vacation<br><input type="radio"/> Other | <input type="radio"/> Outpatient / ambulatory rotation<br><input type="radio"/> In-hospital consult rotation<br><input type="radio"/> Intensive care unit rotation<br><input type="radio"/> In-hospital ward rotation<br><input type="radio"/> Night team / night float<br><input type="radio"/> Emergency Department<br><input type="radio"/> Research<br><input type="radio"/> Elective<br><input type="radio"/> Vacation<br><input type="radio"/> Other | <input type="radio"/> Outpatient / ambulatory rotation<br><input type="radio"/> In-hospital consult rotation<br><input type="radio"/> Intensive care unit rotation<br><input type="radio"/> In-hospital ward rotation<br><input type="radio"/> Night team / night float<br><input type="radio"/> Emergency Department<br><input type="radio"/> Research<br><input type="radio"/> Elective<br><input type="radio"/> Vacation<br><input type="radio"/> Other |
| Timing of work that best describes the week (>4 days)                                                                           | <input type="radio"/> Day team<br><input type="radio"/> Night team<br><input type="radio"/> Rotating<br><input type="radio"/> Irregular                                                                                                                                                                                                                                                                                                                    | <input type="radio"/> Day team<br><input type="radio"/> Night team<br><input type="radio"/> Rotating<br><input type="radio"/> Irregular                                                                                                                                                                                                                                                                                                                    | <input type="radio"/> Day team<br><input type="radio"/> Night team<br><input type="radio"/> Rotating<br><input type="radio"/> Irregular                                                                                                                                                                                                                                                                                                                    | <input type="radio"/> Day team<br><input type="radio"/> Night team<br><input type="radio"/> Rotating<br><input type="radio"/> Irregular                                                                                                                                                                                                                                                                                                                    |
| Hours spent <u>physically</u> awake in the hospital, classes, or workplace (exclude moonlighting for extra income)              |                                                                                                                                                                                                                                                                                                                                                                                                                                                            |                                                                                                                                                                                                                                                                                                                                                                                                                                                            |                                                                                                                                                                                                                                                                                                                                                                                                                                                            |                                                                                                                                                                                                                                                                                                                                                                                                                                                            |
| Hours spent working or studying outside of the hospital or workplace (e.g., at home or at the library) related to your program. |                                                                                                                                                                                                                                                                                                                                                                                                                                                            |                                                                                                                                                                                                                                                                                                                                                                                                                                                            |                                                                                                                                                                                                                                                                                                                                                                                                                                                            |                                                                                                                                                                                                                                                                                                                                                                                                                                                            |
| Hours spent working at any other job outside of your program (including moonlighting)                                           |                                                                                                                                                                                                                                                                                                                                                                                                                                                            |                                                                                                                                                                                                                                                                                                                                                                                                                                                            |                                                                                                                                                                                                                                                                                                                                                                                                                                                            |                                                                                                                                                                                                                                                                                                                                                                                                                                                            |
| Hours of sleep <u>at</u> the workplace or hospital                                                                              |                                                                                                                                                                                                                                                                                                                                                                                                                                                            |                                                                                                                                                                                                                                                                                                                                                                                                                                                            |                                                                                                                                                                                                                                                                                                                                                                                                                                                            |                                                                                                                                                                                                                                                                                                                                                                                                                                                            |
| Hours of sleep <u>outside</u> of the workplace or hospital                                                                      |                                                                                                                                                                                                                                                                                                                                                                                                                                                            |                                                                                                                                                                                                                                                                                                                                                                                                                                                            |                                                                                                                                                                                                                                                                                                                                                                                                                                                            |                                                                                                                                                                                                                                                                                                                                                                                                                                                            |

## Supplemental Material

|                                                  |  |  |  |  |
|--------------------------------------------------|--|--|--|--|
| Number of days off (i.e., a full 24 hour period) |  |  |  |  |
|--------------------------------------------------|--|--|--|--|

In [MONTH], what was the longest number of continuous hours that you were actually physically at work?

*Include protected time for sleep provided during an extended shift and round to the nearest hour*

hours

In [MONTH], what was the longest number of continuous hours that you went without sleep?

*Please round to the nearest hour*

hours

In [Month], on average per week, how many hours were spent:

|                                                                                                                                                                                          |             |
|------------------------------------------------------------------------------------------------------------------------------------------------------------------------------------------|-------------|
| Participating in direct patient care (examining patients, writing notes, interpreting diagnostic tests/radiographic studies/pathology specimens, consulting with other physicians, etc.) | _____ hours |
| In the workplace in duties not directly related to patient care (other paperwork, scheduling tests, etc.)                                                                                | _____ hours |
| In formal structured learning including classes/ laboratories/grand rounds                                                                                                               | _____ hours |
| In self-directed learning outside of the workplace                                                                                                                                       | _____ hours |
| Teaching students or house staff                                                                                                                                                         | _____ hours |
| In leisure activities outside of the hospital or workplace                                                                                                                               | _____ hours |

## Supplemental Material

The following questions ask about your extended shifts during the month ( $\geq 24$  hours continuous at work).

|                                                                                                | First week of<br>[month] | Second week<br>of [month] | Third week of<br>[month] | Fourth week<br>of [month] |
|------------------------------------------------------------------------------------------------|--------------------------|---------------------------|--------------------------|---------------------------|
| Number of extended shifts                                                                      |                          |                           |                          |                           |
| Average length of<br>extended shift                                                            |                          |                           |                          |                           |
| Number of these shifts<br>covered by night float                                               |                          |                           |                          |                           |
| Average hours of night<br>float coverage (per night)                                           |                          |                           |                          |                           |
| Average hours of sleep<br>during these extended<br>shifts                                      |                          |                           |                          |                           |
| Average number of times<br>you were awakened from<br>sleep per extended shift<br>(e.g., paged) |                          |                           |                          |                           |



## Supplemental Material

**Outcomes**

In the month of [month], how many times did you nod off or fall asleep:

|                                            | Number of times you nodded off or fell asleep* | Check if not applicable                                               |
|--------------------------------------------|------------------------------------------------|-----------------------------------------------------------------------|
| During lectures, seminars, or grand rounds | _____                                          | <input type="radio"/> I didn't attend any that month                  |
| On the telephone                           | _____                                          |                                                                       |
| During rounds with the attending           | _____                                          | <input type="radio"/> I didn't do rounds with an attending that month |
| While talking to or examining patients     | _____                                          | <input type="radio"/> I didn't examine/talk with patients that month  |
| During surgery                             | _____                                          | <input type="radio"/> I didn't do surgeries that month                |
| While driving                              | _____                                          | <input type="radio"/> I didn't drive that month                       |
| While stopped in traffic                   | _____                                          |                                                                       |

\*Enter 0 for zero or none, unless the option does not apply (then leave blank).

For the following question, please answer only in terms of when you personally were driving.

In the month of [month], did you have any motor vehicle accidents or crashes (actual collisions) in which you were driving ?

- Yes  
 No

In the month of [month], did you have any near-miss motor vehicle accidents or crashes (narrowly avoided property damage or bodily harm) in which you were driving?

- Yes  
 No

In the month of [month], did you personally have an occupational exposure to potentially contaminated blood or other body fluid?

- Yes  
 No

## Supplemental Material

**In the month of [month], did you cause an occupational exposure to potentially contaminated blood or other body fluid to others?**

- Yes  
 No

**In the month of [month], do you believe sleep deprivation or fatigue caused you to make a significant medical error (whether or not an adverse patient outcome occurred)?**

- Yes  
 No

**If you answered No to M1, skip to the next section**

**Approximately how many errors did you have in the month of [month]?**

errors

**How many, if any, errors resulted in an adverse patient outcome?**

Adverse outcomes

**If 0, skip this section**

**Please confirm you had \_\_\_ [fill in response from M2] error(s) that resulted in \_\_\_ [fill in response from M3] adverse patient outcome(s)?**

- Yes, that is correct  
 No, I will correct my answer to the previous questions.

**If 0, skip this section**

**How many, if any, errors resulted in a fatality?**

Fatalities

**Please take a moment and tell us a few words about each error?**

---



---



---



---



---

## Supplemental Material

In the month of [month], do you believe that you made a significant medical error, whether or not an adverse patient outcome occurred, other than due sleep deprivation or fatigue?

- Yes  
 No

**If you answered No to R1, skip to the next section**

Approximately how many errors did you have in the month of [month]?

errors

How many, if any, errors resulted in an adverse patient outcome?

Adverse outcomes

**If 0, skip this section**

Please confirm you had \_\_\_ [fill in response from M2] error(s) that resulted in \_\_\_ [fill in response from M3] adverse patient outcome(s)?

- Yes, that is correct  
 No, I will correct my answer to the previous questions.

**If 0, skip this section**

How many, if any, errors resulted in a fatality?

Fatalities

Please take a moment and tell us a few words about each error?

---

---

---

---
